# Supplementary material for: Polyanionic Carboxyethyl Peptide Nucleic Acids (ce-PNAs): Synthesis and DNA Binding
Source: PubMed Central journal article supplement (PMC4607454; doi:10.1371/journal.pone.0140468), 2015-10-15

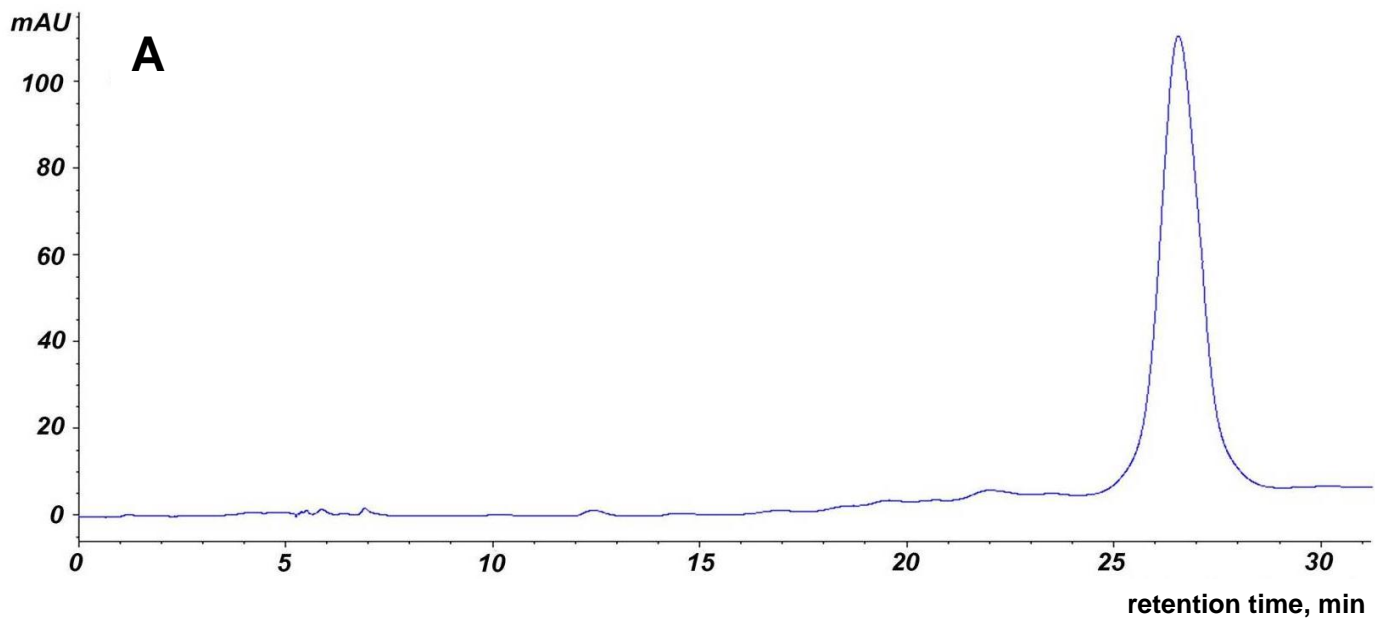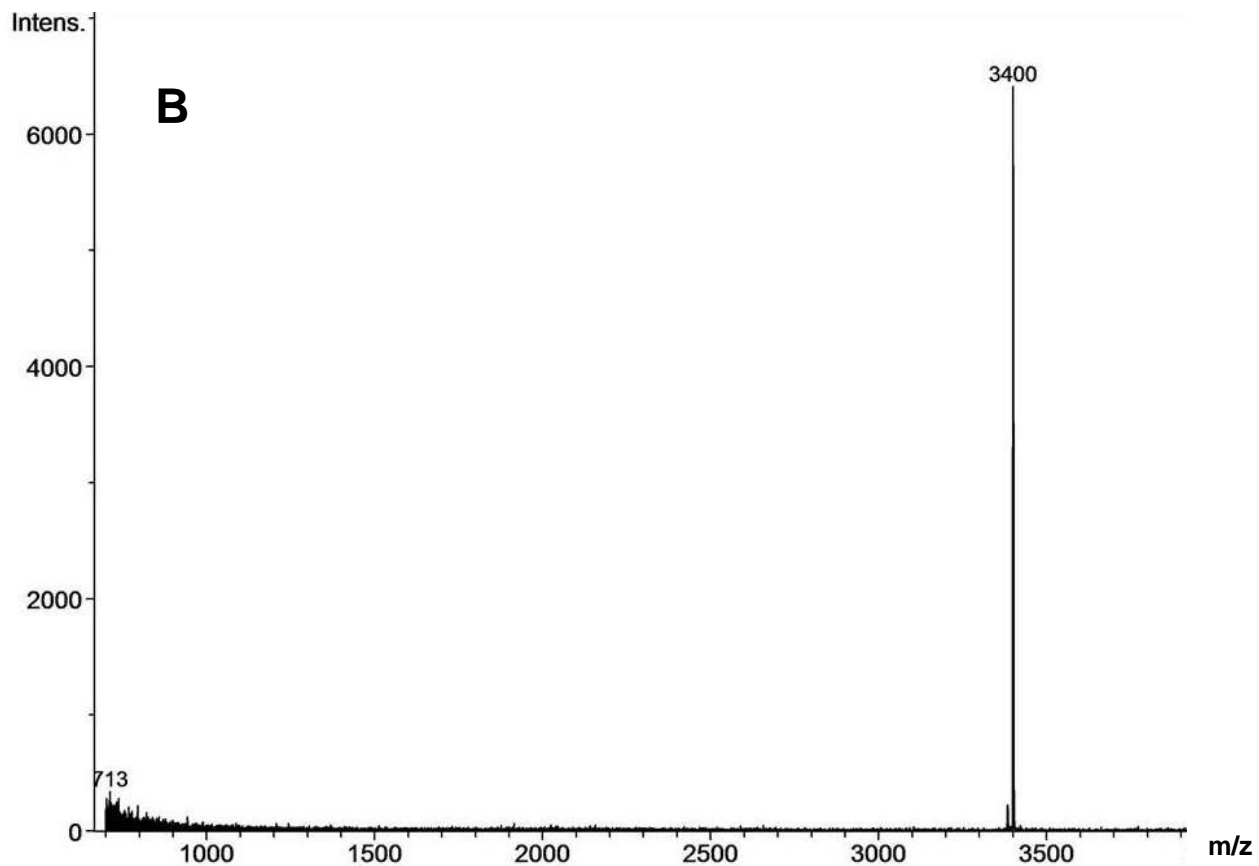

Supplement: pone.0140468.s002.pdf [file pone.0140468.s002.pdf]
