# Supplementary material for: Polyanionic Carboxyethyl Peptide Nucleic Acids (ce-PNAs): Synthesis and DNA Binding
Source: PubMed Central journal article supplement (PMC4607454; doi:10.1371/journal.pone.0140468), 2015-10-15

**A**

- $\gamma$ -ce-H-T10-Gly-OH (2)/dA10,  $T_m > 85^\circ\text{C}$
- $\gamma$ -ce-H-T10-Gly-OH (2)/d(A4TA5),  $T_m = 78 \pm 1^\circ\text{C}$
- $\gamma$ -ce-H-T10-Gly-OH (2)/d(A4CA5),  $T_m = 79 \pm 1^\circ\text{C}$
- $\gamma$ -ce-H-T10-Gly-OH (2)/(dA4GA5),  $T_m = 76 \pm 1^\circ\text{C}$

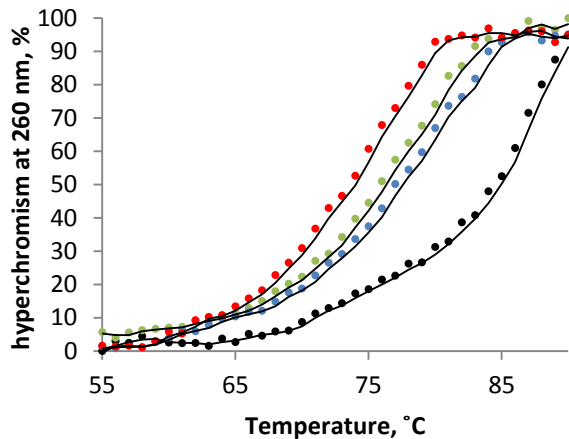**B**

- $\gamma$ -ce-H-T10-Gly-OH (2)/dA10,  $T_m > 80^\circ\text{C}$
- $\gamma$ -ce-H-T10-Gly-OH (2)/d(A4TA5),  $T_m = 74 \pm 1^\circ\text{C}$
- $\gamma$ -ce-H-T10-Gly-OH (2)/d(A4CA5),  $T_m = 76 \pm 1^\circ\text{C}$
- $\gamma$ -ce-H-T10-Gly-OH (2)/(dA4GA5),  $T_m = 72 \pm 1^\circ\text{C}$

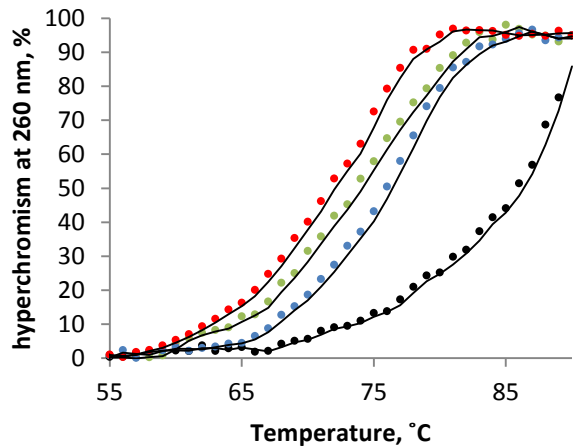

Supplement: pone.0140468.s004.pdf [file pone.0140468.s004.pdf]
